# Supplementary material
Source: ML conference proceedings conference paper supplement (https://openaccess.thecvf.com/content/WACV2023/html/Dubost_Semi-Supervised_Learning_for_WACV_2023_paper.html)
Supplement: Supplementary file 1 [file Dubost_Semi-Supervised_Learning_for_WACV_2023_supplemental.pdf]

# Semi-Supervised Learning for Sparsely-Labeled Sequential Data: Application to Healthcare Video Processing Supplementary Materials

Florian Dubost\*<sup>1</sup>, Erin Hong\*<sup>1</sup>, Siyi Tang<sup>1</sup>  
Nandita Bhaskhar<sup>1</sup>, Christopher Lee-Messer<sup>1</sup>, and Daniel Rubin<sup>1</sup>

<sup>1</sup>Stanford University

{floriandubost1, erin.hong17}@gmail.com, {cleemess, rubin}@stanford.edu

\*equal contribution

Table 1. **Statistics of the full hospital video dataset.**

| Label      | Nbr of windows | Average length (sec) | Median length (sec) | Standard Deviation (sec) | Total length (sec) | Number of patients |
|------------|----------------|----------------------|---------------------|--------------------------|--------------------|--------------------|
| Suctioning | 45             | 14.36                | 10                  | 14.46                    | 646                | 20                 |
| Chewing    | 15             | 89.07                | 45                  | 91.23                    | 1336               | 12                 |
| Rocking    | 21             | 54.67                | 24                  | 71.08                    | 1148               | 10                 |
| Cares      | 44             | 88.66                | 46                  | 170.59                   | 3901               | 23                 |
| Patting    | 33             | 38.64                | 21                  | 40.49                    | 1275               | 9                  |
| All        | 158            | 52.57                | 25                  | 104.47                   | 8306               | 59                 |

Table 2. **Statistics of the training split of the hospital video dataset.**

| Label      | Nbr of windows | Average length (sec) | Median length (sec) | Standard Deviation (sec) | Total length (sec) | Number of patients |
|------------|----------------|----------------------|---------------------|--------------------------|--------------------|--------------------|
| suctioning | 12             | 20.92                | 16                  | 14.92                    | 251                | 5                  |
| chewing    | 5              | 147.4                | 130                 | 98.04                    | 737                | 4                  |
| rocking    | 6              | 92.33                | 56                  | 97.53                    | 554                | 2                  |
| cares      | 18             | 122.56               | 41                  | 255.59                   | 2206               | 8                  |
| patting    | 10             | 42.2                 | 18                  | 56                       | 422                | 3                  |

Table 3. **Statistics of the validation split of the hospital video dataset.**

| Label      | Nbr of windows | Average length (sec) | Median length (sec) | Standard Deviation (sec) | Total length (sec) | Number of patients |
|------------|----------------|----------------------|---------------------|--------------------------|--------------------|--------------------|
| suctioning | 18             | 13.5                 | 11                  | 10.96                    | 243                | 7                  |
| chewing    | 6              | 44.33                | 20                  | 42.13                    | 266                | 5                  |
| rocking    | 8              | 45.75                | 24                  | 53.7                     | 366                | 4                  |
| cares      | 15             | 75.33                | 65                  | 50.24                    | 1130               | 10                 |
| patting    | 17             | 31.41                | 17                  | 28.8                     | 534                | 4                  |

Table 4. **Statistics of the testing split of the hospital video dataset.**

| Label      | Nbr of windows | Average length (sec) | Median length (sec) | Standard Deviation (sec) | Total length (sec) | Number of patients |
|------------|----------------|----------------------|---------------------|--------------------------|--------------------|--------------------|
| suctioning | 15             | 10.13                | 7                   | 15.88                    | 152                | 8                  |
| chewing    | 4              | 83.25                | 44                  | 96.14                    | 333                | 3                  |
| rocking    | 7              | 32.57                | 17                  | 43.74                    | 228                | 4                  |
| cares      | 11             | 51.36                | 34                  | 50.54                    | 565                | 5                  |
| patting    | 6              | 53.17                | 52                  | 32.53                    | 319                | 2                  |

Table 5. **Results on the HMDB51 dataset.** Brushing hair vs. draw sword. We observe an early positive contribution of N with a late and progressively increasing negative contribution (same as CIFAR) with  $\alpha_1 = 3, \beta_1 = 1, \alpha_2 = 0.5,$  and  $\beta_2 = 9.$

| Risk Level (N)  | 1       | 2       | 3       | 4       | 5       |
|-----------------|---------|---------|---------|---------|---------|
| mAP, mean (std) | 71 (6)  | 61 (9)  | 85 (5)  | 77 (11) | 72 (16) |
| mF1, mean (std) | 61 (27) | 60 (23) | 83 (14) | 58 (34) | 39 (43) |

| Task:    | Risk Level (N) |             |                   |             |                   |                   |                   |            |                   |
|----------|----------------|-------------|-------------------|-------------|-------------------|-------------------|-------------------|------------|-------------------|
| car vs.  | 1              | 2           | 3                 | 4           | 5                 | 6                 | 7                 | 8          | 9                 |
| airplane | 70.6 (11.4)    | 66.3 (4.6)  | 79.7 (4.2)        | 82.8 (4.7)  | 80.9 (5.8)        | 87.6 (3.3)        | 72.9 (3.2)        | 85.3 (5.5) | <b>88.0 (9.2)</b> |
| bird     | 83.2 (4.4)     | 75.1 (15.6) | <b>90.6 (3.3)</b> | 83.7 (4.6)  | 86.3 (4.4)        | 71.7 (7.9)        | 89.9 (3.0)        | 88.8 (3.3) | 85.4 (4.9)        |
| cat      | 84.5 (5.7)     | 84.7 (3.6)  | 84.7 (3.7)        | 87.9 (3.5)  | 89.7 (2.3)        | <b>89.9 (1.7)</b> | 82.5 (5.2)        | 86.9 (1.8) | 81.2 (7.0)        |
| deer     | 87.3 (3.1)     | 89.7 (2.5)  | 85.2 (4.3)        | 87.8 (2.4)  | 84.9 (4.3)        | 81.0 (4.4)        | 86.4 (3.9)        | 85.1 (3.1) | 85.4 (4.6)        |
| dog      | 87.5 (3.4)     | 88.7 (1.5)  | 89.8 (1.6)        | 93.7 (1.2)  | 87.5 (3.8)        | 90.4 (2.8)        | <b>95.0 (1.0)</b> | 92.5 (1.1) | 88.3 (2.9)        |
| frog     | 81.3 (5.6)     | 88.0 (2.9)  | <b>92.2 (2.6)</b> | 92.8 (2.1)  | 88.3 (1.6)        | 85.3 (4.1)        | 88.6 (1.4)        | 83.7 (4.8) | 76.9 (5.4)        |
| horse    | 83.0 (3.4)     | 88.8 (5.2)  | 87.4 (2.8)        | 91.3 (2.5)  | 90.8 (3.0)        | 84.1 (5.1)        | 78.2 (4.1)        | 77.7 (9.4) | <b>91.6 (2.3)</b> |
| ship     | 70.5 (4.6)     | 59.0 (7.0)  | 68.9 (4.6)        | 81.1 (2.7)  | 77.2 (3.7)        | <b>84.6 (6.4)</b> | 76.1 (4.6)        | 72.8 (1.8) | 75.9 (6.1)        |
| truck    | 66.4 (6.1)     | 69.7 (5.9)  | 71.5 (4.6)        | 57.6 (16.9) | <b>74.5 (6.0)</b> | 72.8 (6.2)        | 73.6 (7.4)        | 58.9 (7.0) | 55.7 (8.5)        |

Table 6. **Recall for the CIFAR-10 dataset.** Means (standard deviations) are computed for 10 repetitions of the experiments with different random initialization of the weights. Best statistically significant results (p-value < 0.05) are highlighted in bold.

| Task:    | Risk Level (N) |                   |                   |                   |            |                   |                   |            |            |
|----------|----------------|-------------------|-------------------|-------------------|------------|-------------------|-------------------|------------|------------|
| car vs.  | 1              | 2                 | 3                 | 4                 | 5          | 6                 | 7                 | 8          | 9          |
| airplane | 72.3 (5.5)     | 72.9 (4.1)        | 82.0 (2.0)        | 81.2 (2.2)        | 78.8 (2.7) | <b>82.5 (0.9)</b> | 77.4 (1.7)        | 80.0 (3.0) | 76.4 (3.8) |
| bird     | 77.5 (2.0)     | 67.9 (9.2)        | 77.9 (0.6)        | 75.5 (1.3)        | 77.5 (1.2) | 70.9 (2.7)        | <b>79.5 (1.7)</b> | 76.7 (0.8) | 77.0 (1.4) |
| cat      | 68.1 (1.6)     | 67.4 (1.1)        | 72.4 (1.7)        | 74.7 (1.2)        | 73.7 (1.1) | <b>75.5 (1.2)</b> | 66.9 (1.8)        | 69.0 (1.3) | 68.3 (3.0) |
| deer     | 72.5 (2.6)     | 74.9 (2.1)        | 71.4 (0.7)        | <b>75.7 (1.6)</b> | 72.8 (1.1) | 70.0 (1.4)        | 71.2 (1.4)        | 73.2 (0.7) | 73.2 (0.7) |
| dog      | 71.6 (0.9)     | 70.0 (1.0)        | <b>73.9 (1.0)</b> | 72.8 (0.7)        | 70.7 (1.5) | 72.5 (1.7)        | 71.5 (1.4)        | 73.8 (0.8) | 72.5 (1.9) |
| frog     | 61.8 (2.6)     | 65.4 (0.9)        | 70.7 (1.9)        | 68.1 (1.6)        | 66.6 (1.3) | <b>71.2 (2.2)</b> | 66.7 (0.4)        | 63.7 (0.7) | 59.7 (2.2) |
| horse    | 67.2 (1.1)     | 66.0 (2.2)        | 67.2 (1.2)        | 69.5 (2.2)        | 67.2 (1.2) | 71.7 (2.9)        | <b>74.1 (1.7)</b> | 72.2 (3.0) | 69.4 (1.3) |
| ship     | 72.1 (2.3)     | 67.4 (3.9)        | 74.9 (2.4)        | 78.1 (1.0)        | 77.4 (1.7) | <b>80.1 (2.2)</b> | 76.0 (2.0)        | 73.5 (1.1) | 75.7 (2.0) |
| truck    | 62.1 (2.6)     | <b>68.7 (3.8)</b> | 64.2 (2.0)        | 55.7 (6.4)        | 61.1 (2.8) | 68.5 (2.5)        | 57.3 (2.9)        | 61.4 (3.1) | 63.5 (4.5) |

Table 7. **F1-scores for the CIFAR-10 dataset.** Means (standard deviations) are computed for 10 repetitions of the experiments with different random initialization of the weights. Best statistically significant results (p-value < 0.05) are highlighted in bold.

| Task:    | Risk Level (N) |            |                   |                   |            |                   |                   |            |                   |
|----------|----------------|------------|-------------------|-------------------|------------|-------------------|-------------------|------------|-------------------|
| car vs.  | 1              | 2          | 3                 | 4                 | 5          | 6                 | 7                 | 8          | 9                 |
| airplane | 73.5 (2.3)     | 75.5 (3.5) | <b>82.6 (1.4)</b> | 80.8 (2.0)        | 78.3 (2.6) | 81.4 (1.0)        | 78.7 (1.3)        | 78.7 (3.2) | 72.9 (4.1)        |
| bird     | 75.9 (2.1)     | 65.4 (7.5) | 74.2 (1.6)        | 72.9 (1.4)        | 74.9 (1.9) | 70.8 (1.5)        | 76.8 (2.3)        | 73.1 (0.9) | 74.6 (1.3)        |
| cat      | 60.5 (1.2)     | 59.1 (1.4) | 67.7 (2.4)        | <b>70.1 (2.1)</b> | 67.9 (1.6) | 70.8 (1.8)        | 59.2 (1.5)        | 60.8 (2.6) | 62.5 (3.3)        |
| deer     | 66.7 (4.4)     | 69.8 (3.5) | 65.8 (2.4)        | <b>71.8 (2.3)</b> | 68.4 (1.4) | 65.3 (1.0)        | 65.0 (1.9)        | 68.8 (1.2) | 68.7 (1.0)        |
| dog      | 65.3 (1.5)     | 61.9 (2.1) | <b>68.3 (2.0)</b> | 64.9 (1.4)        | 63.7 (2.3) | 65.7 (3.4)        | 62.1 (2.6)        | 67.2 (1.4) | 66.4 (2.9)        |
| frog     | 49.9 (2.6)     | 53.5 (1.1) | 61.7 (4.0)        | 56.4 (3.4)        | 55.7 (2.9) | <b>65.4 (3.9)</b> | 55.7 (1.2)        | 52.3 (2.4) | 48.2 (1.6)        |
| horse    | 59.5 (2.9)     | 54.4 (2.5) | 57.4 (1.4)        | 59.9 (4.0)        | 55.7 (2.6) | 66.6 (5.6)        | <b>72.6 (2.0)</b> | 70.3 (2.9) | 59.5 (2.8)        |
| ship     | 72.8 (1.4)     | 71.8 (1.9) | 76.9 (1.6)        | 77.2 (0.7)        | 77.6 (1.2) | <b>79.0 (2.2)</b> | 76.0 (1.6)        | 73.7 (1.2) | 75.8 (0.8)        |
| truck    | 59.7 (1.2)     | 68.1 (5.8) | 60.2 (3.3)        | 56.0 (6.3)        | 52.7 (3.7) | 66.5 (3.4)        | 45.6 (1.0)        | 63.2 (2.8) | <b>68.5 (1.8)</b> |

Table 8. **AUC for the CIFAR-10 dataset.** Means (standard deviations) are computed for 10 repetitions of the experiments with different random initialization of the weights. Best statistically significant (p-value < 0.05) results are highlighted in bold.

| Task:<br>car vs. | Risk Level (N)    |            |                   |                   |            |                   |                   |            |                   |
|------------------|-------------------|------------|-------------------|-------------------|------------|-------------------|-------------------|------------|-------------------|
|                  | 1                 | 2          | 3                 | 4                 | 5          | 6                 | 7                 | 8          | 9                 |
| airplane         | 75.6 (3.6)        | 81.2 (4.0) | <b>84.6 (1.4)</b> | 79.7 (2.5)        | 77.2 (4.1) | 78.1 (2.1)        | 82.7 (2.2)        | 75.5 (3.7) | 68.1 (4.9)        |
| bird             | <b>72.7 (2.6)</b> | 63.0 (6.8) | 68.4 (2.5)        | 69.0 (2.3)        | 70.5 (3.1) | 70.9 (3.3)        | 71.3 (2.7)        | 67.7 (1.5) | 70.4 (2.2)        |
| cat              | 57.1 (1.1)        | 56.0 (1.1) | 63.3 (2.4)        | 65.0 (2.6)        | 62.5 (1.5) | <b>65.1 (1.7)</b> | 56.3 (1.1)        | 57.2 (2.0) | 59.2 (2.8)        |
| deer             | 62.1 (3.8)        | 64.4 (3.7) | 61.6 (2.8)        | <b>66.6 (2.3)</b> | 63.9 (1.9) | 61.7 (1.1)        | 60.6 (1.7)        | 64.2 (1.5) | 64.2 (2.0)        |
| dog              | 60.6 (1.5)        | 57.8 (1.7) | <b>62.8 (2.0)</b> | 59.5 (1.1)        | 59.4 (1.9) | 60.7 (3.2)        | 57.4 (1.8)        | 61.5 (1.2) | 61.5 (2.5)        |
| frog             | 49.9 (1.6)        | 52.1 (0.7) | 57.4 (2.9)        | 53.8 (2.3)        | 53.6 (1.9) | <b>61.3 (4.1)</b> | 53.5 (0.8)        | 51.5 (1.7) | 48.9 (1.1)        |
| horse            | 56.6 (2.5)        | 52.7 (1.6) | 54.6 (0.9)        | 56.2 (3.0)        | 53.4 (1.8) | 63.0 (5.7)        | <b>70.6 (3.1)</b> | 68.3 (4.2) | 55.9 (2.0)        |
| ship             | 73.9 (0.6)        | 79.5 (2.3) | <b>82.2 (2.4)</b> | 75.4 (1.1)        | 77.8 (1.0) | 76.5 (4.1)        | 76.1 (2.3)        | 74.2 (2.0) | 76.0 (2.4)        |
| truck            | 58.6 (1.2)        | 68.5 (7.1) | 58.5 (3.5)        | 60.8 (14.1)       | 52.0 (2.6) | 65.2 (4.4)        | 47.1 (0.8)        | 65.2 (4.9) | <b>75.5 (3.9)</b> |

Table 9. **Precision for the CIFAR-10 dataset.** Means (standard deviations) are computed for 10 repetitions of the experiments with different random initialization of the weights. Best statistically significant (p-value < 0.05) results are highlighted in bold.
